# Supplementary material for: A N,N-dimethylformamide protected rhodium nanocluster with engrossing optical properties and its application
Source: Royal Society of Chemistry journal article supplement (doi:10.1039/c9dt01036j), 2019-01-01
Supplement: c9dt01036j1.pdf [file c9dt01036j1.pdf]

## Supporting Information

### **N, N-Dimethylformamide Protected Rhodium Nanocluster with Engrossing Optical Property and Their Application**

Manju P. Maman<sup>a</sup>, Saniya Gratiuous<sup>a</sup>, Aparna R K<sup>a</sup> and Sukhendu Mandal<sup>\*a</sup>

<sup>a</sup>School of Chemistry, Indian Institute of Science Education and Research Thiruvananthapuram, Maruthamala P. O., Vithura, Thiruvananthapuram, Kerala, India-695551.

Email: [sukhendu@iisertvm.ac.in](mailto:sukhendu@iisertvm.ac.in)

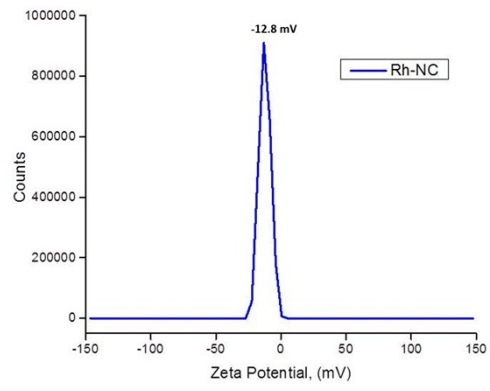

**Figure S1:** Surface zeta potential graph showing negative zeta potential value.

a)

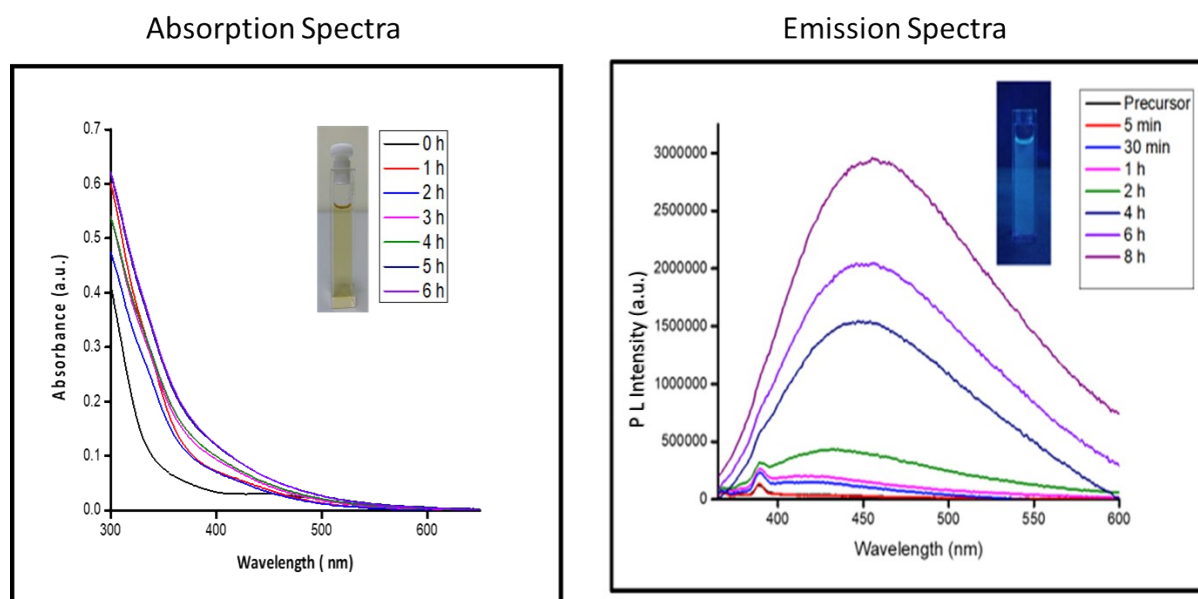

b)

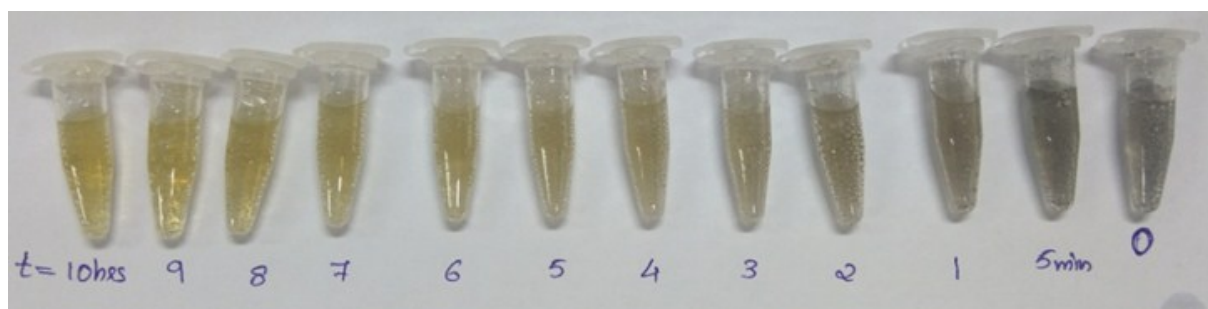

**Figure S2:** a) Controlled experiments (absorption and emission) to monitor the completion of Rh NC synthesis. b) Photograph of the sample after being reduced by 1 equiv. of  $\text{NaBH}_4$  at different time intervals.

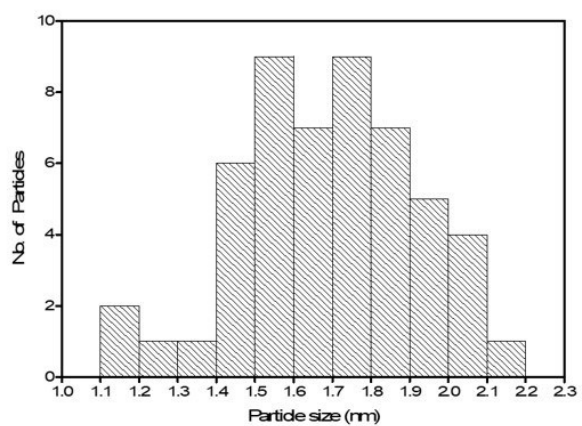

Size < 2.2 nm

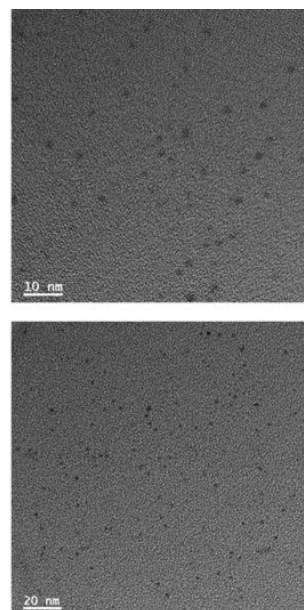

**Figure S3:** TEM images and bar diagram of the as-synthesized DMF protected rhodium nanocluster.

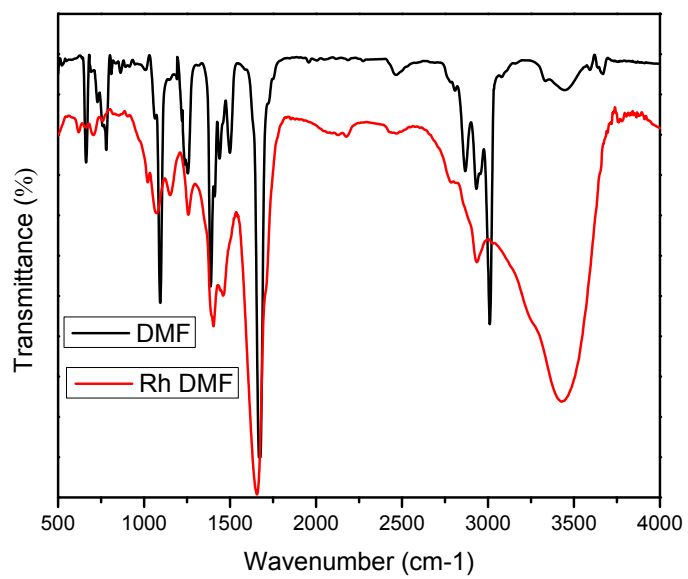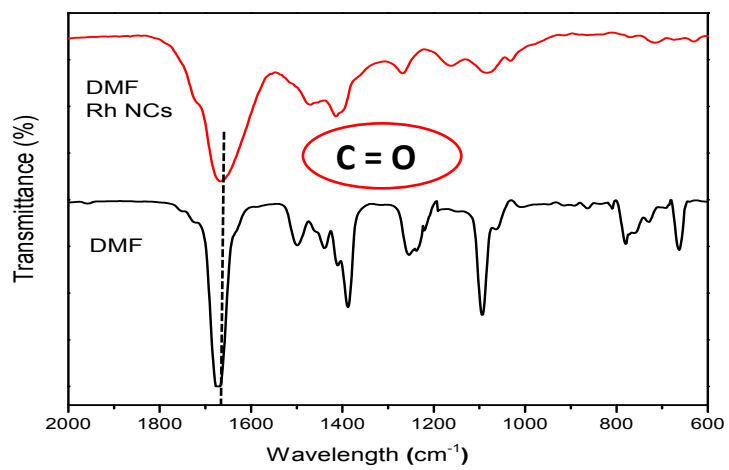

**Figure S4:** Infrared spectra of pure DMF molecule and DMF protected Rh NC. Note that boarding and shifting of C=O stretching at lower wave numbers (1673 to 1656  $\text{cm}^{-1}$ ) indicating the interaction of DMF molecules with Rh metal ion in the cluster.

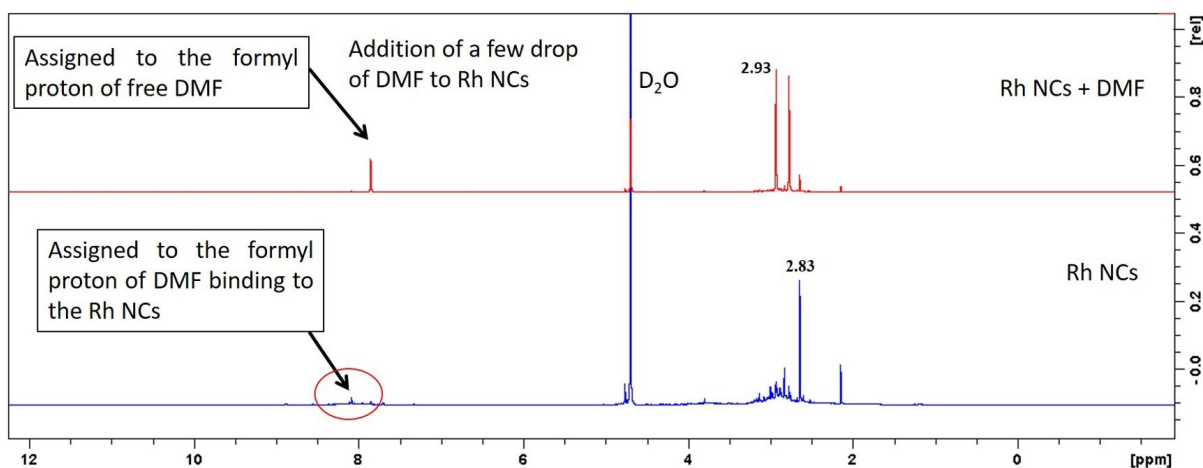

**Figure S5:**  $^1\text{H}$  NMR spectra in  $\text{D}_2\text{O}$  for DMF bonded Rh cluster and freely added DMF into the Rh NCs.

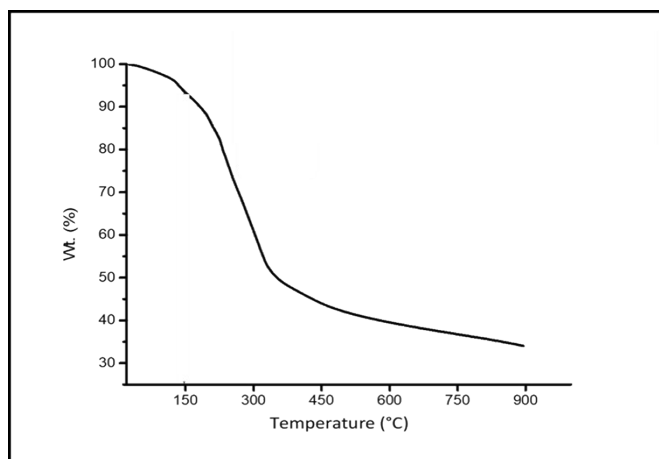

**Figure S6:** Thermogravimetric plot of DMF-bonded Rh NC.

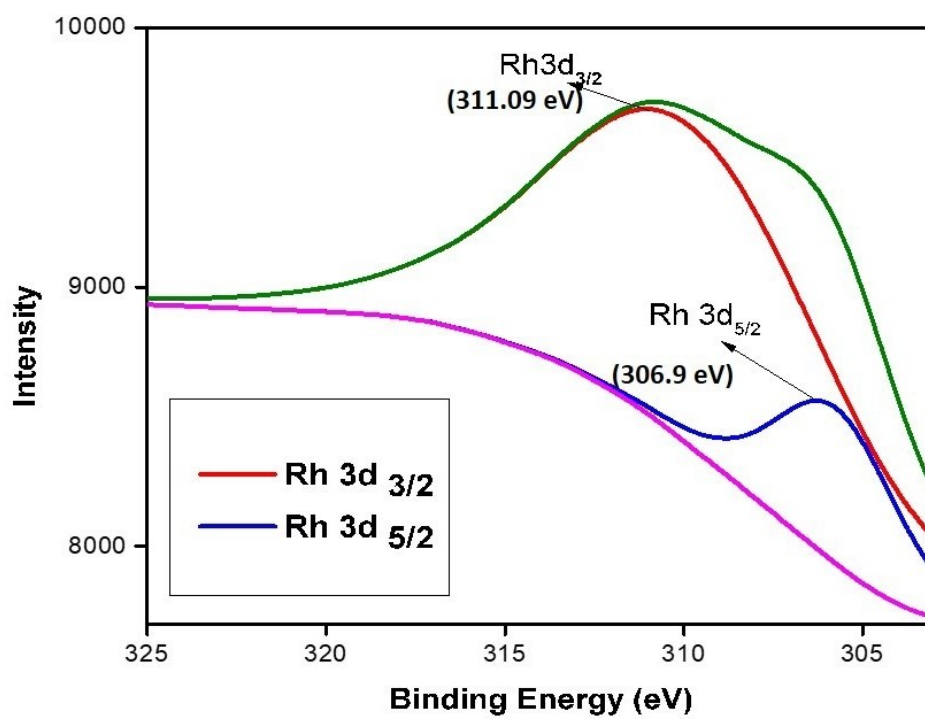



**Figure S7:** The XPS spectrum of the DMF-protected Rh NC.

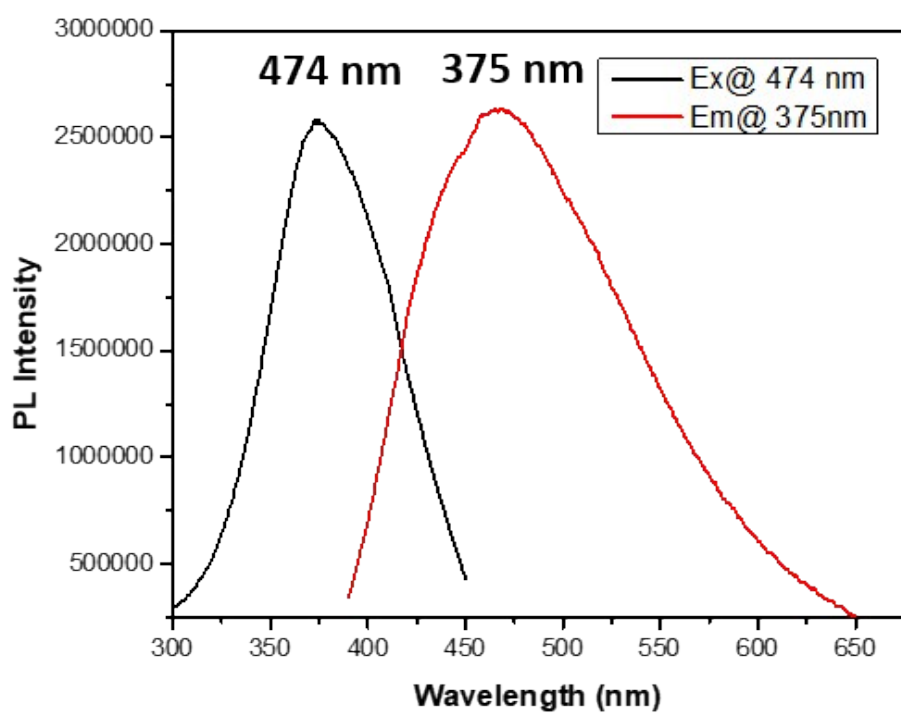

**Figure S8:** Emission spectra of the Rh NC.

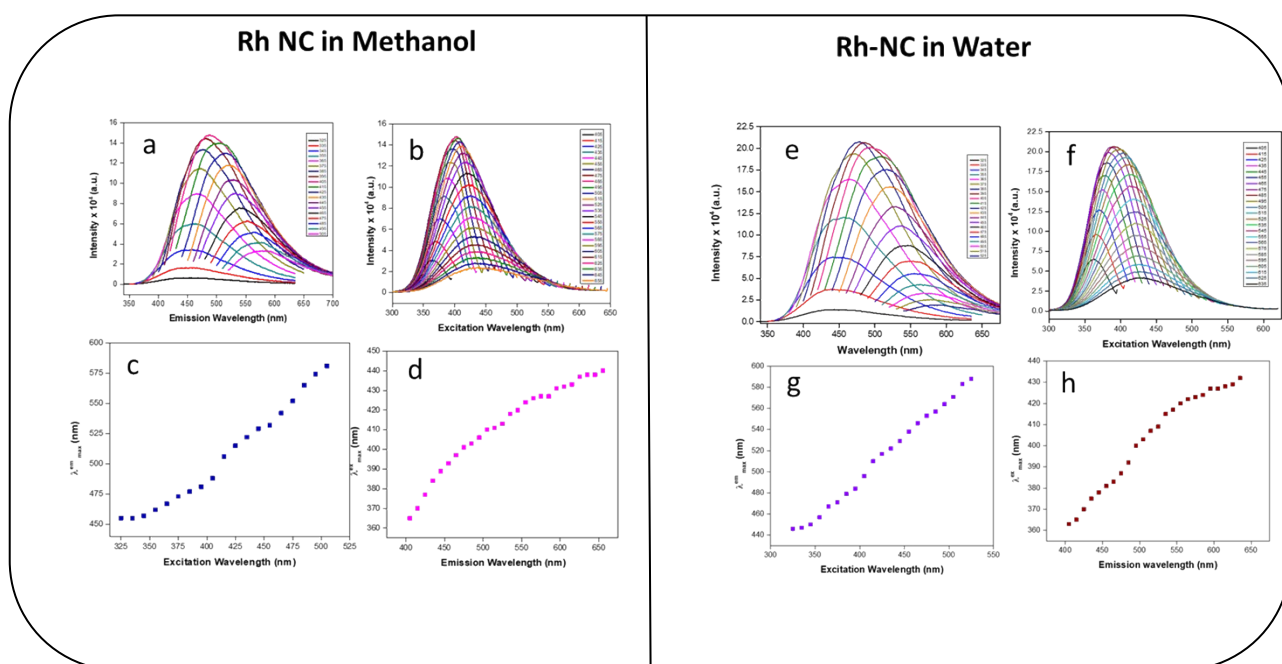

**Figure S9.** (a) and (e) are the emission spectra at different excitation wavelength. (b) and (f) are excitation spectra at different emission wavelength. (c) and (g) represent the fluorescence maxima ( $\lambda_{\max}^{\text{em}}$ ) as a function of excitation wavelength ( $\lambda_{\text{ex}}$ ). (d) and (h) represent excitation maxima ( $\lambda_{\max}^{\text{ex}}$ ) as a function of fluorescence wavelength ( $\lambda_{\text{em}}$ ).

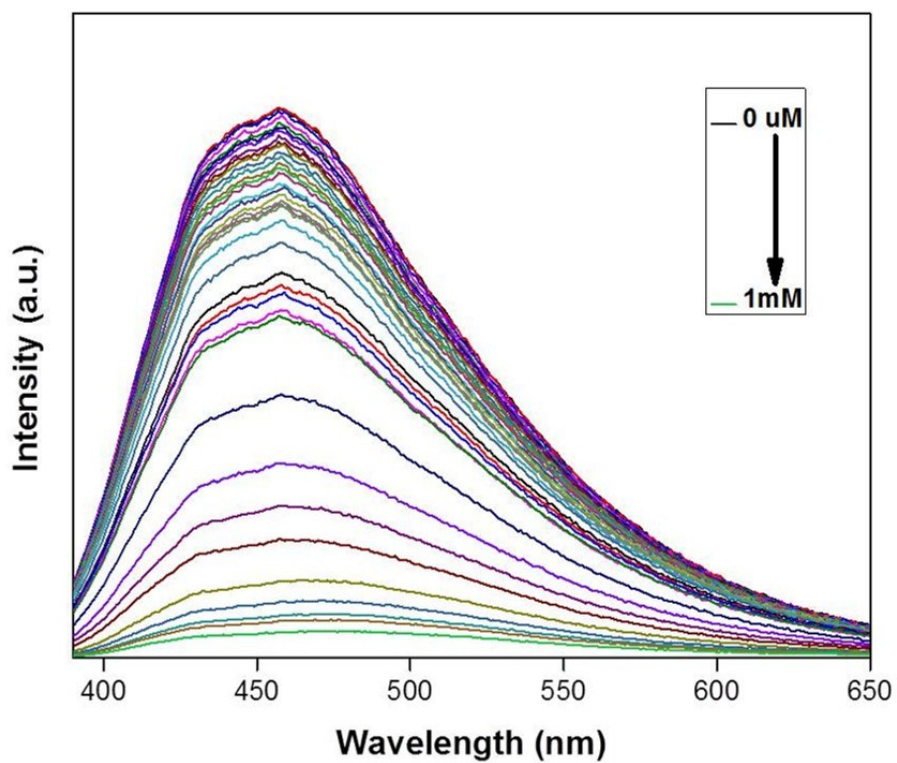

**Figure S10.** Emission spectra of Rh NC solution in the presence of different Cr(VI) ion concentration.

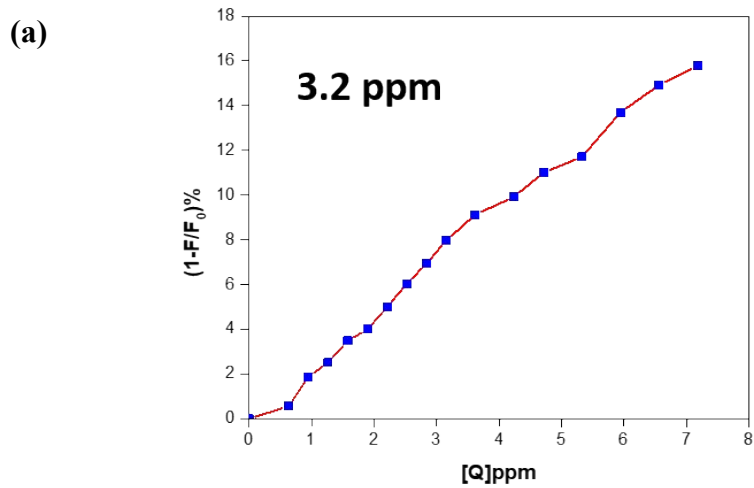

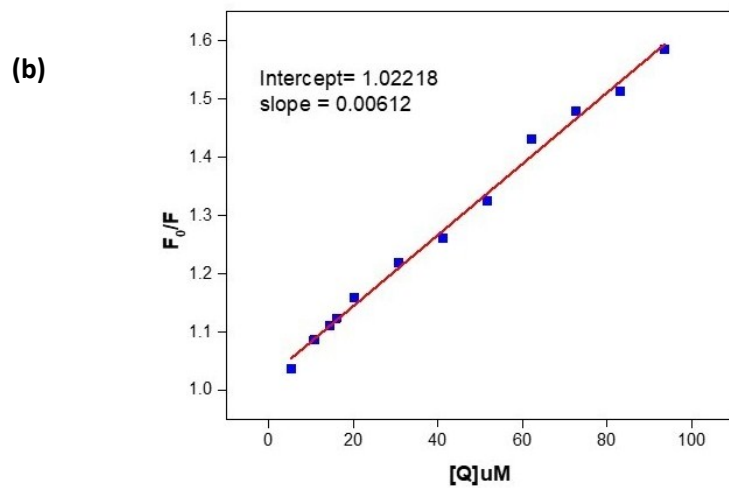

**Figure S11.** Relative fluorescence of Rh NCs as a function of Cr(VI) ion concentration showing the (a) resulting in a linear Stern-Volmer plot, (b) sensitivity of the Rh NC.

a)

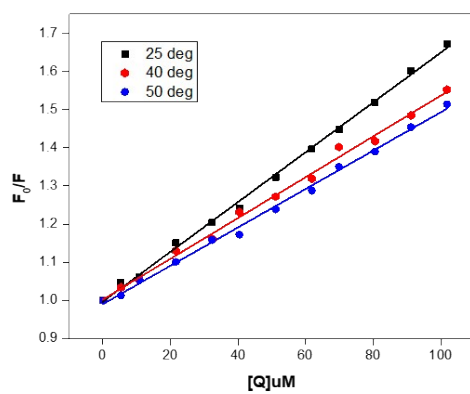

b)

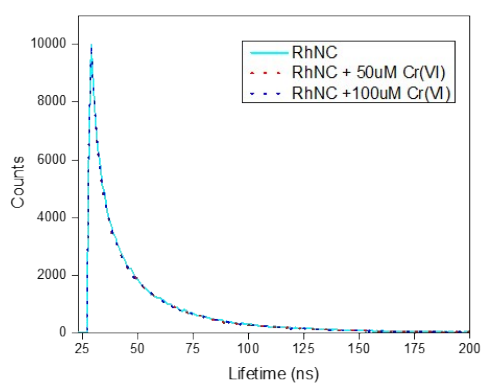

c)

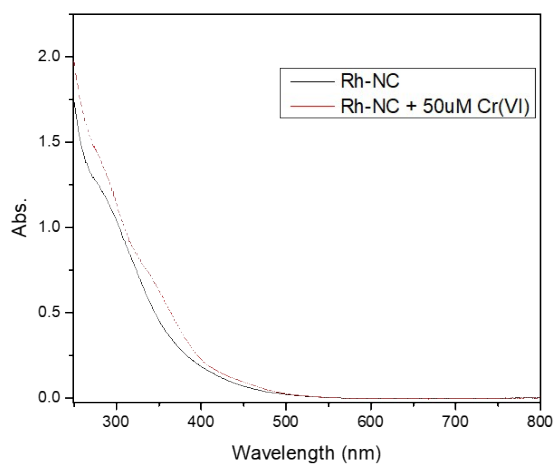

**Figure S12.** a) Temperature dependent Stern-Volmer plot generated by the addition of different concentration of Cr(VI) ion to the Rh NC. b) Fluorescence decay profile of Rh NC in absence and presence of  $\text{Cr}_2\text{O}_7^{2-}$  ion. c) Absorbance spectra of Rh NC before and after addition of  $\text{Cr}_2\text{O}_7^{2-}$  ion.

Table S1. Temperature dependent Stern-Volmer ( $K_{sv}$ ) and bimolecular quenching constants ( $kq$ ) of the Rh NC after addition of  $\text{Cr}_2\text{O}_7^{2-}$  ion.

| T/K | $K_{sv}$ ( $\text{M}^{-1}$ ) | $kq$ ( $\text{M}^{-1}.\text{s}^{-1}$ ) |
|-----|------------------------------|----------------------------------------|
|     |                              |                                        |

|     |                    |                       |
|-----|--------------------|-----------------------|
| 298 | $6.50 \times 10^3$ | $1.79 \times 10^{12}$ |
| 313 | $5.35 \times 10^3$ | $1.47 \times 10^{12}$ |
| 323 | $5.03 \times 10^3$ | $1.46 \times 10^{12}$ |

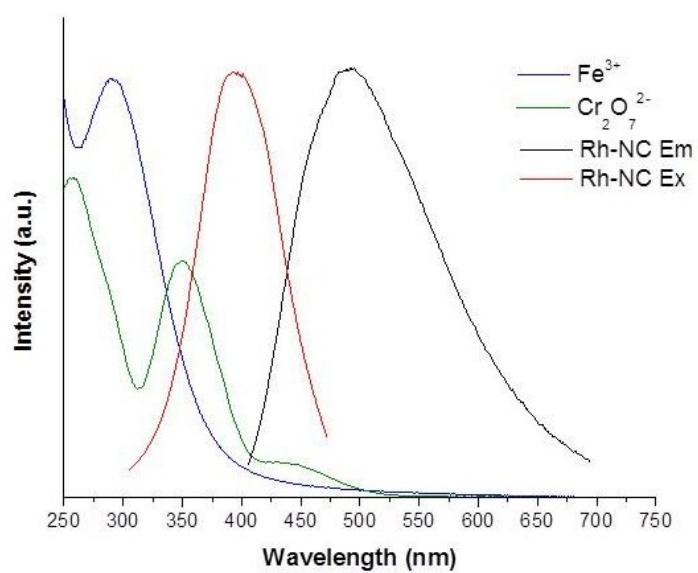

**Figure S13.** Spectral overlaps between the UV-vis absorption spectrum of  $\text{Cr}_2\text{O}_7^{2-}$ ,  $\text{Fe}^{3+}$  and the excitation and emission spectra of Rh NC in water.



Table S2: Comparison of the sensing efficiency of the two cluster having similar optical property.

| <b>Methods</b> | <b>Materials used</b> | <b>Linear range/<math>\mu\text{M}</math></b> | <b>LODs/ M</b>          | <b>Refs.</b> |
|----------------|-----------------------|----------------------------------------------|-------------------------|--------------|
| Fluorescence   | IrNCs                 | 0.1 to 100                                   | $0.025 \times 10^{-6}$  | 1            |
| Fluorescence   | RhNCs                 | 1 to 100                                     | $11 \times 10^{-6}$     | current      |
| Fluorescence   | CuNCs                 | 0.2–60                                       | $0.065 \times 10^{-6}$  | 2            |
| Fluorescence   | CdTe quantum dots     | 0.2–20                                       | $0.154 \times 10^{-6}$  | 3            |
| Fluorescence   | Silicon nanoparticles | 0.1–200                                      | $0.028 \times 10^{-6}$  | 4            |
| Fluorescence   | Carbon dots           | 1–10                                         | $0.2 \times 10^{-6}$    | 5            |
| Fluorescence   | Graphene quantum dots | 0.05–500                                     | $0.0037 \times 10^{-6}$ | 6            |
